# Supplementary material
Source: PubMed Central journal article supplement (PMC4480041)

**Figure 1s:** 89 training set microscopes sorted by quality score: Upper Left to Lower Right (red), Lower Left to Upper Right (blue); Horizontal (yellow). Each of the three microscope traces includes three optimally segmenting lines. (Figure 2s follows after 15 pages).

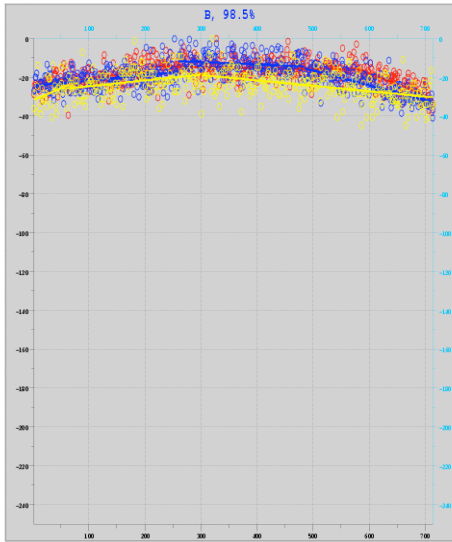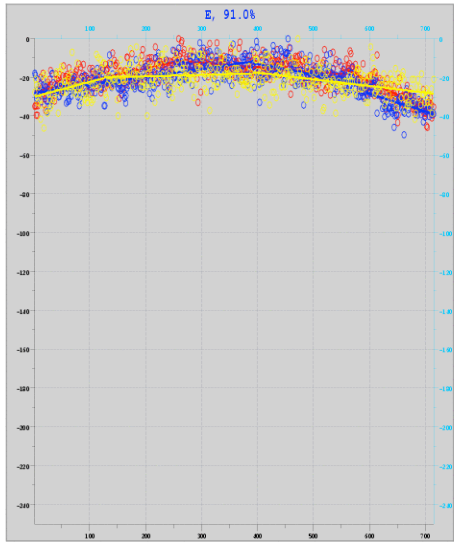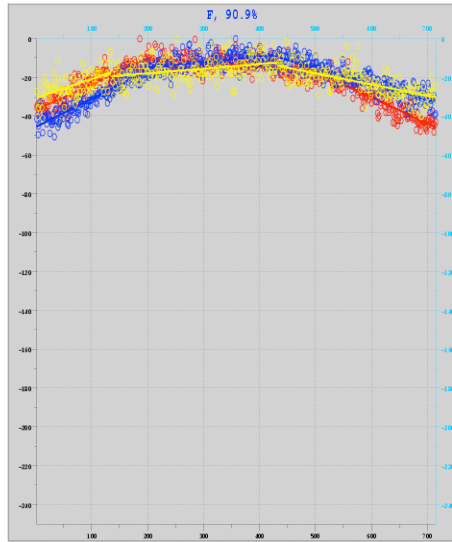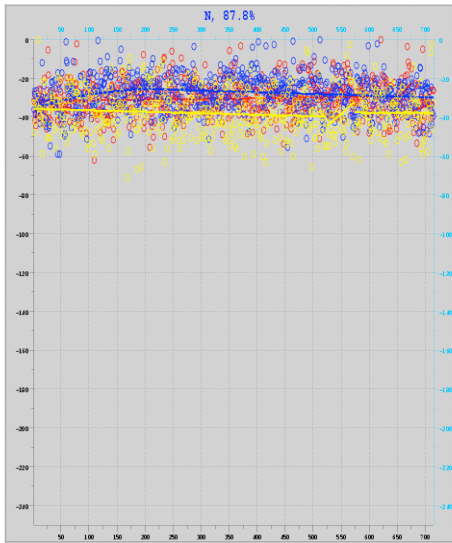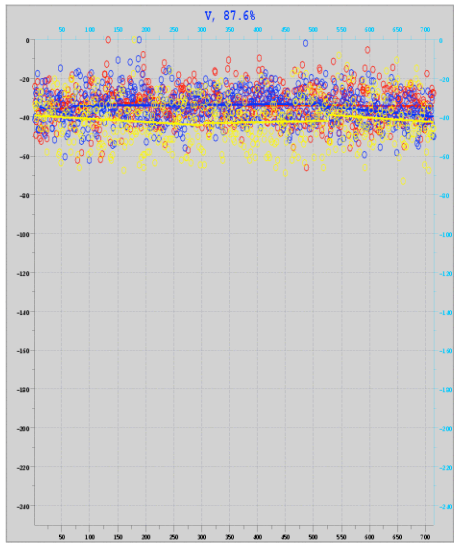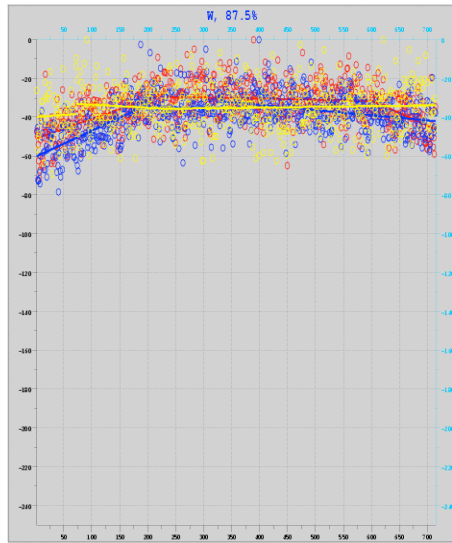

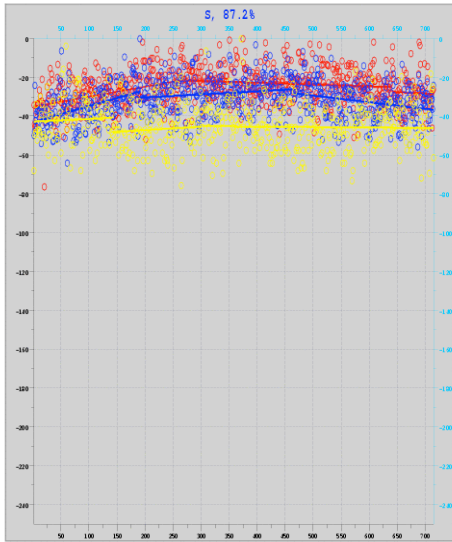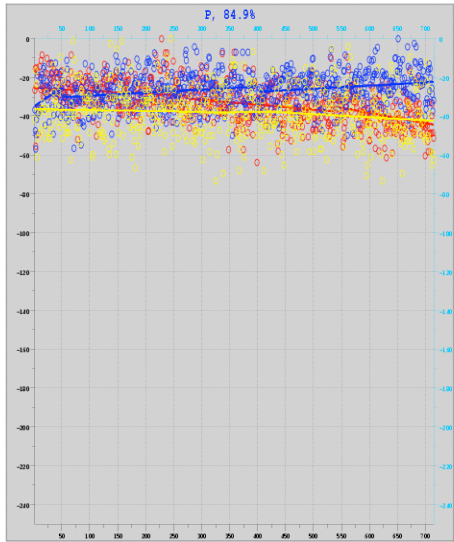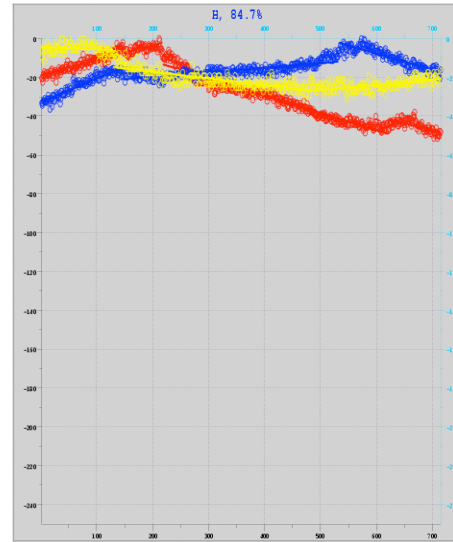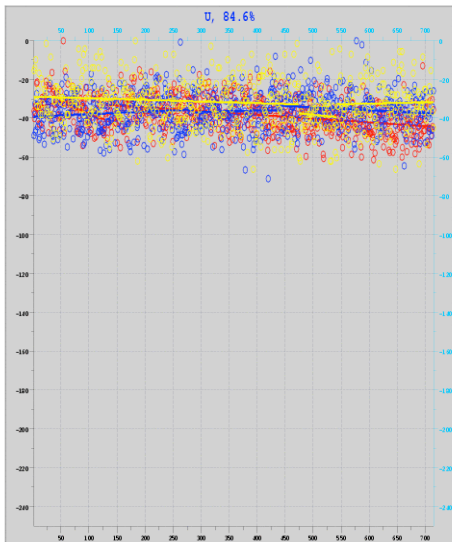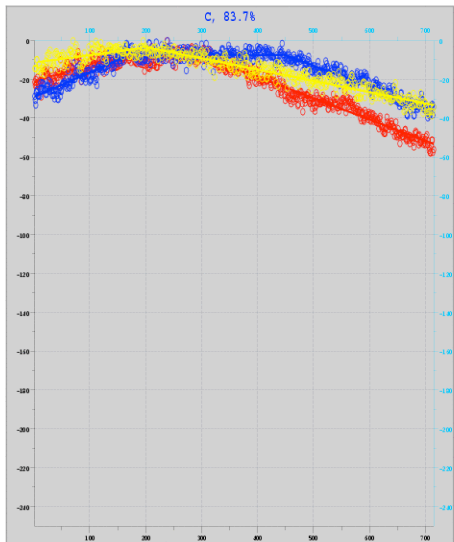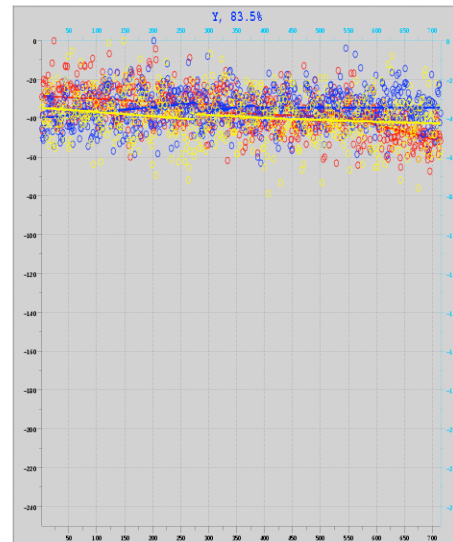

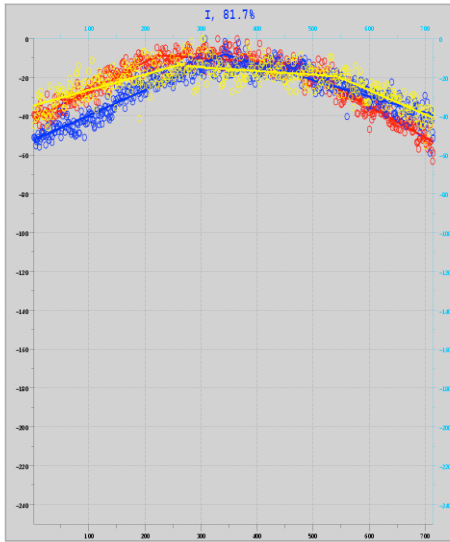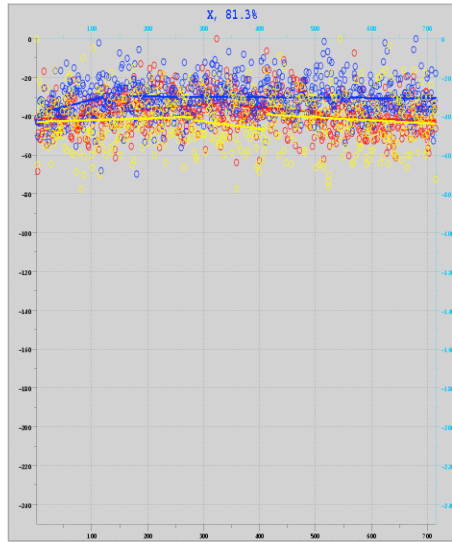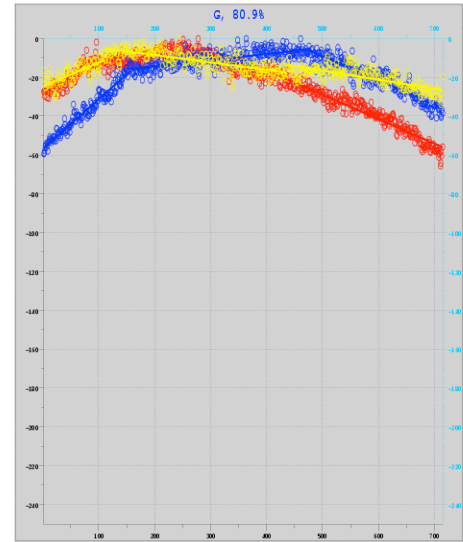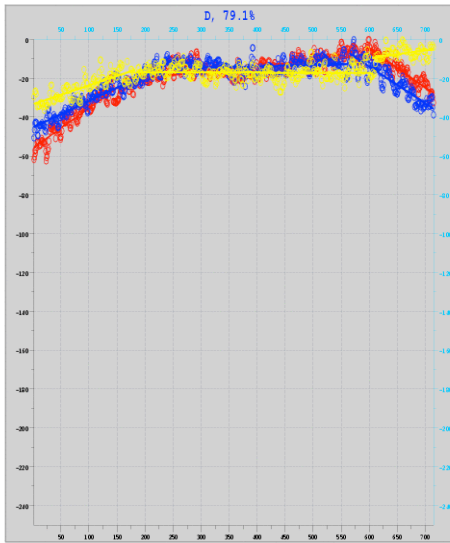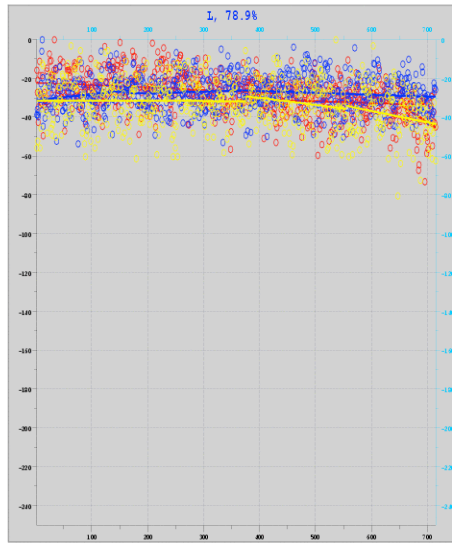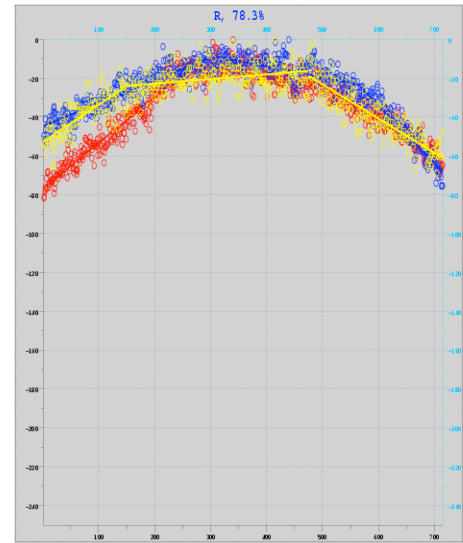

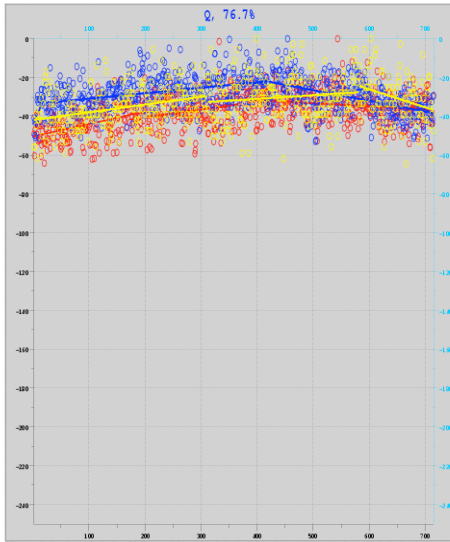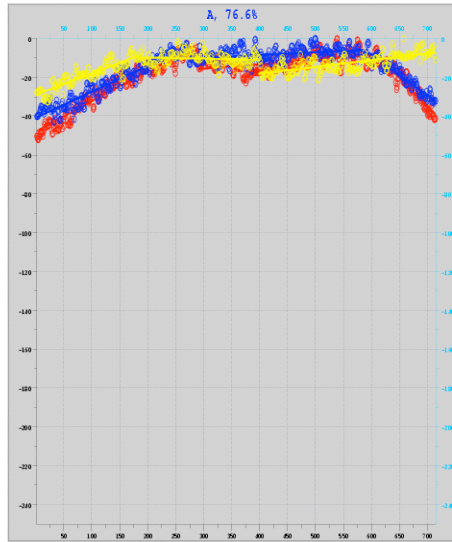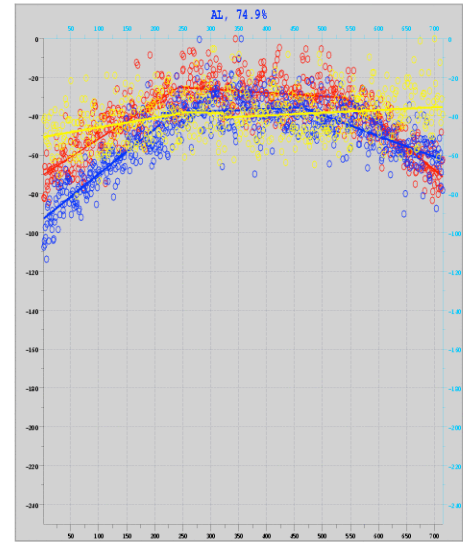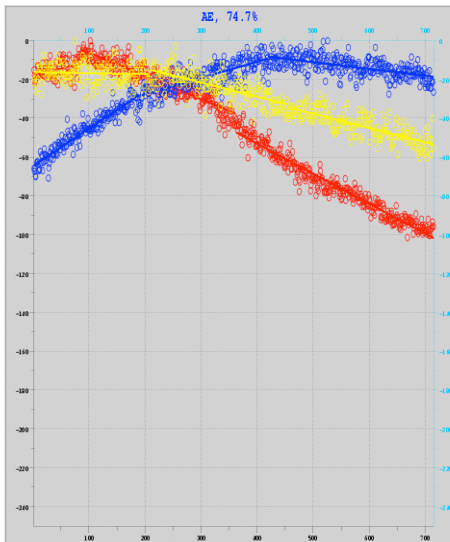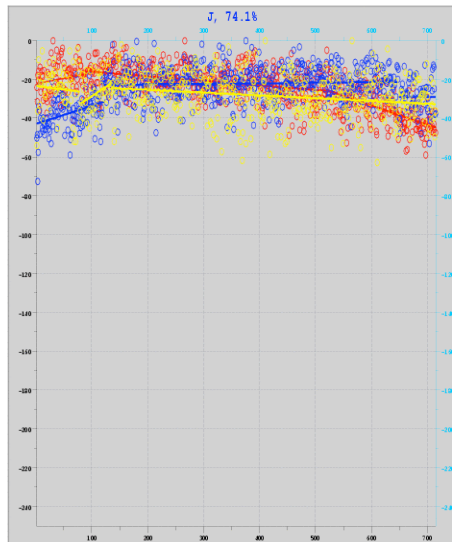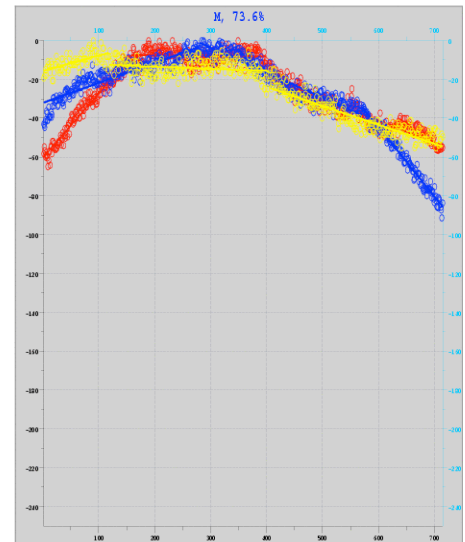

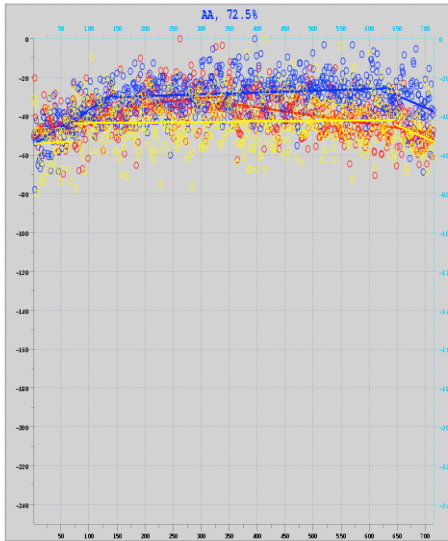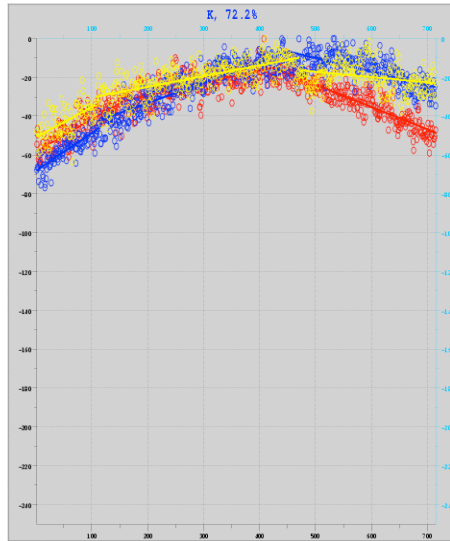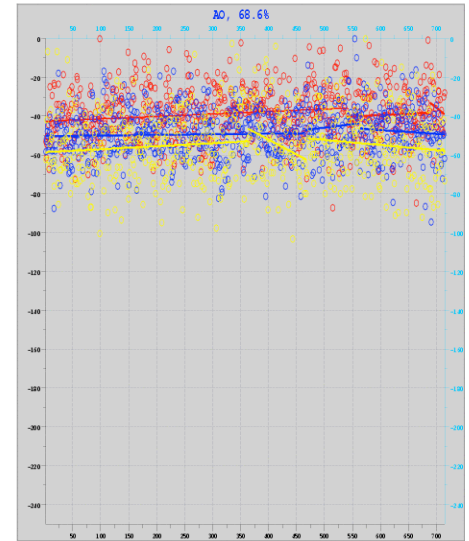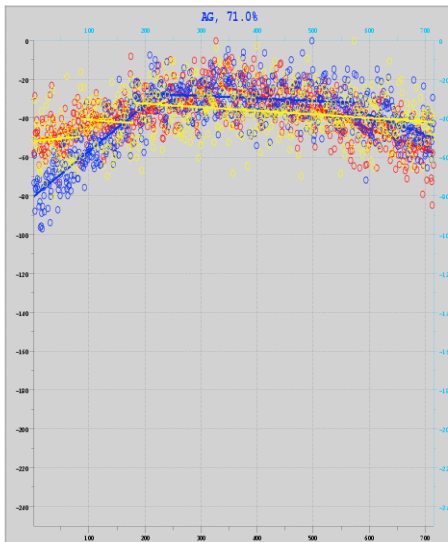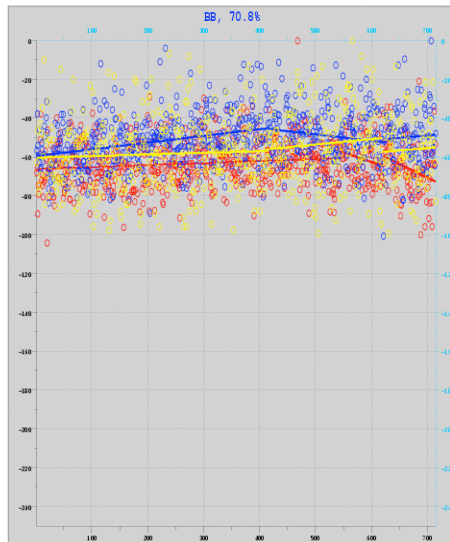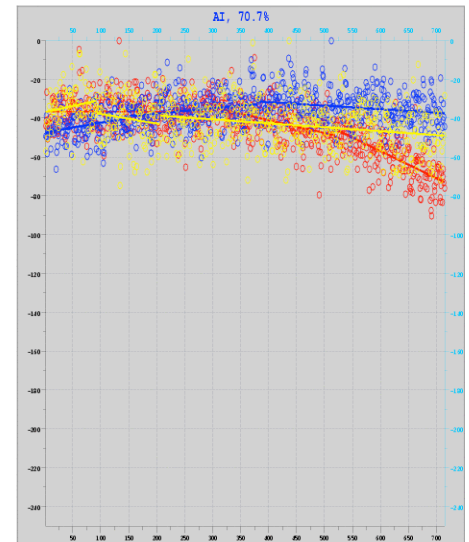

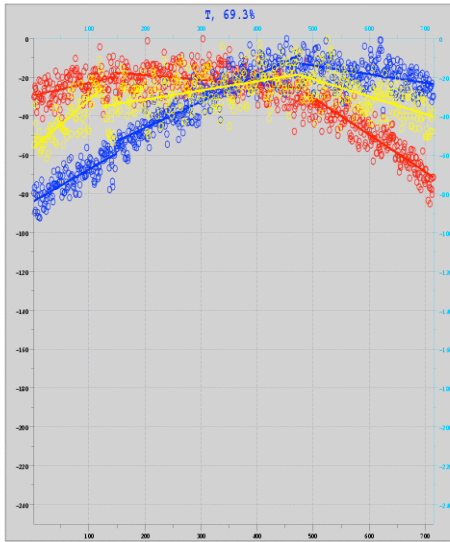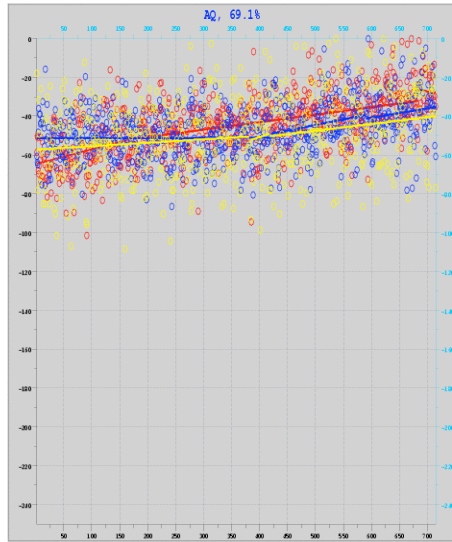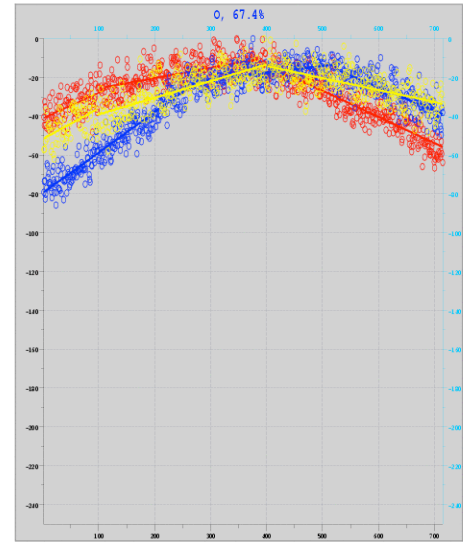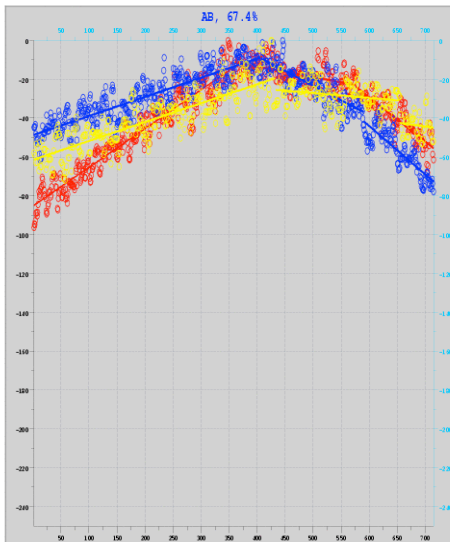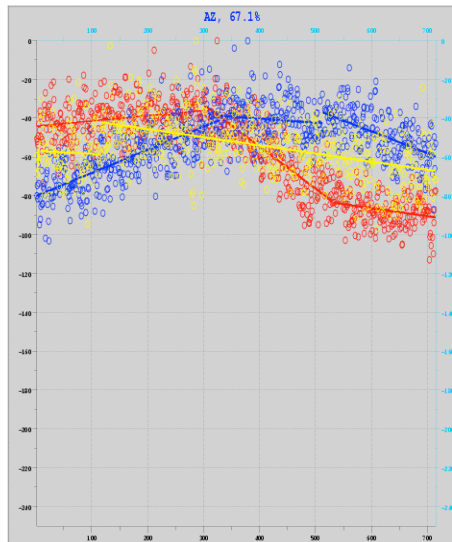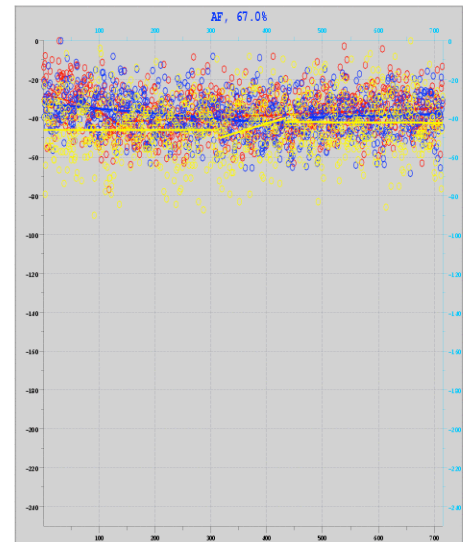

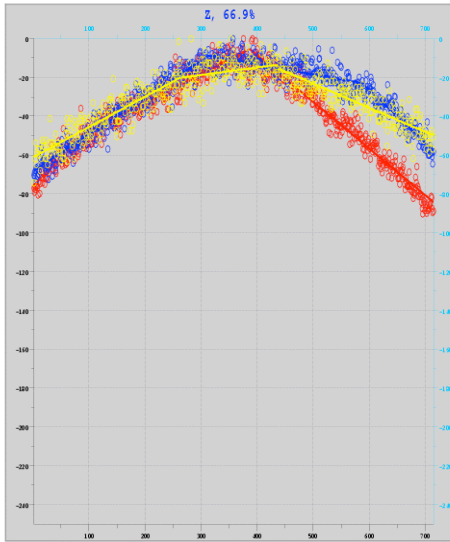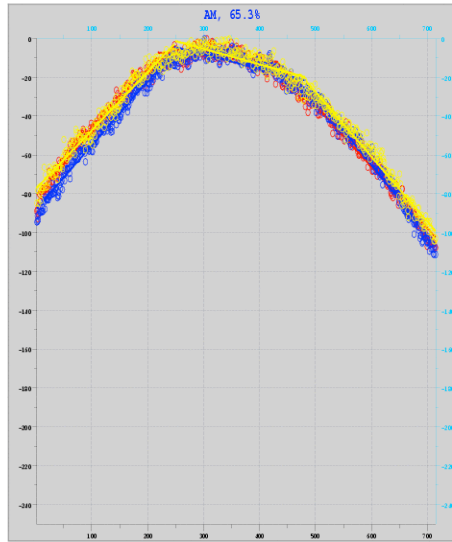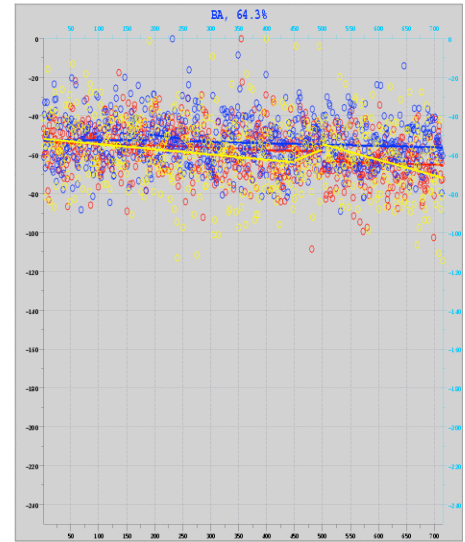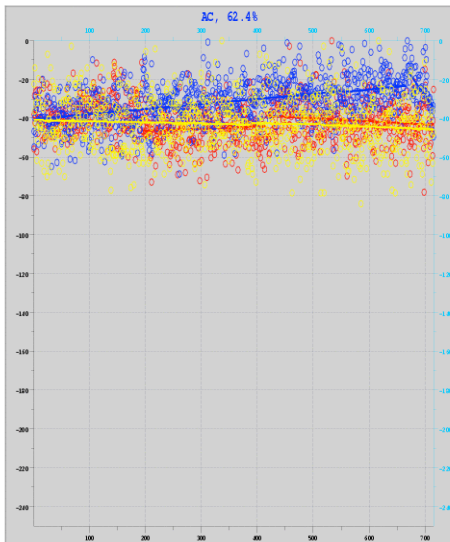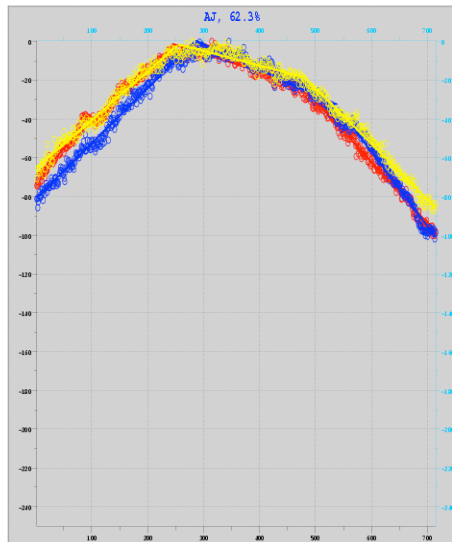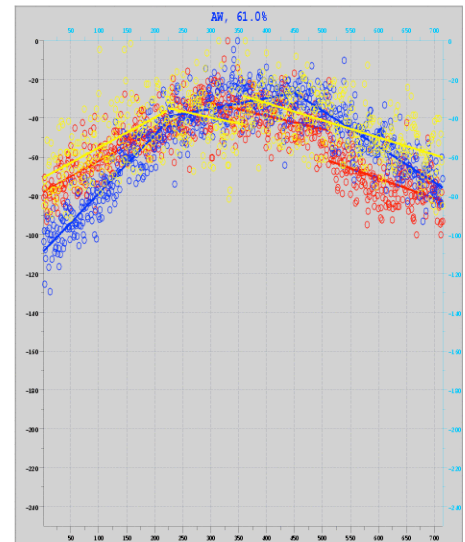



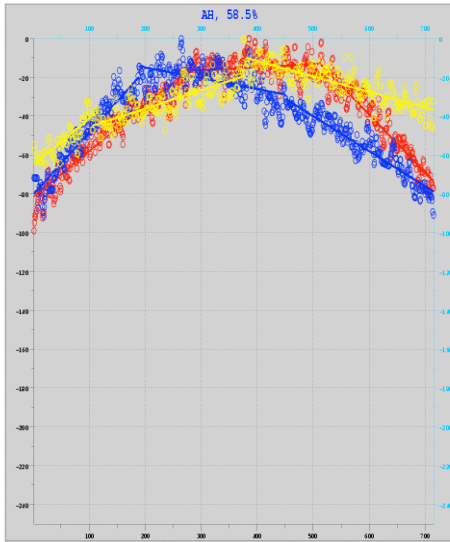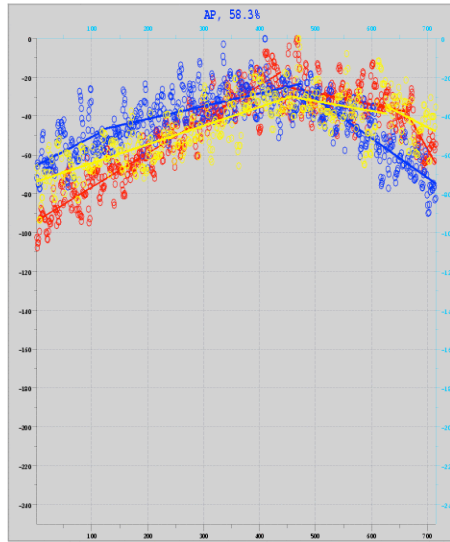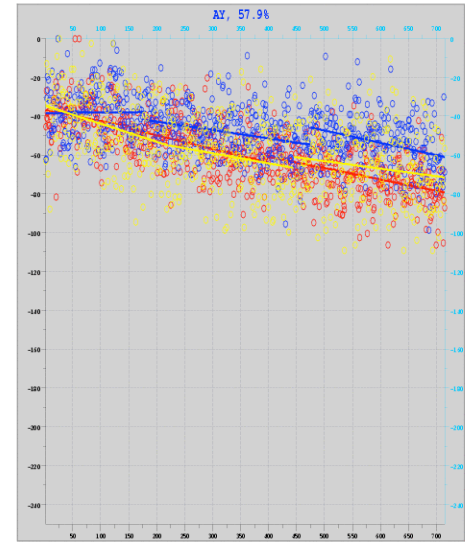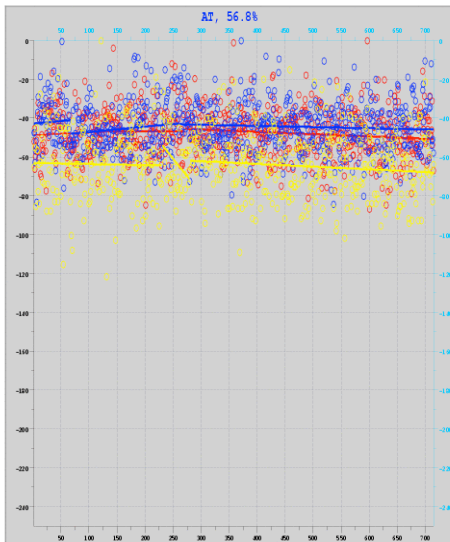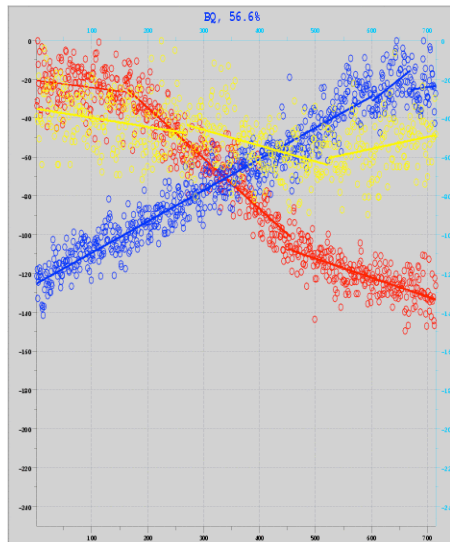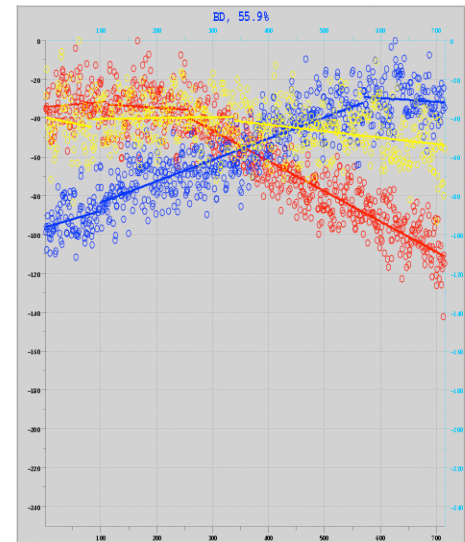

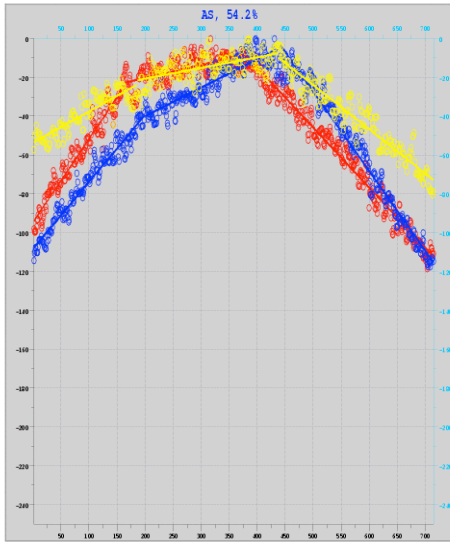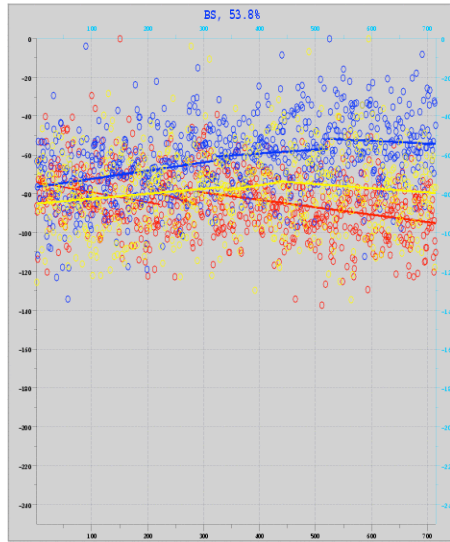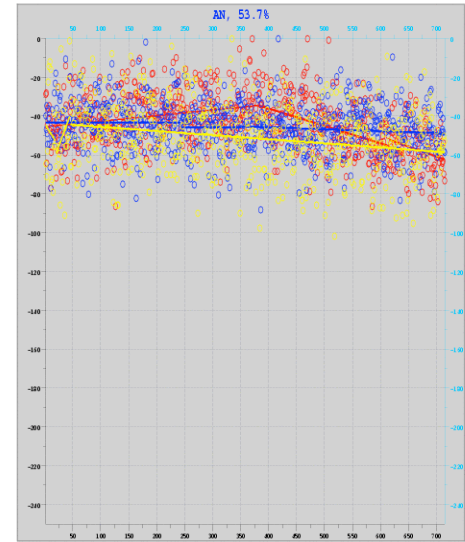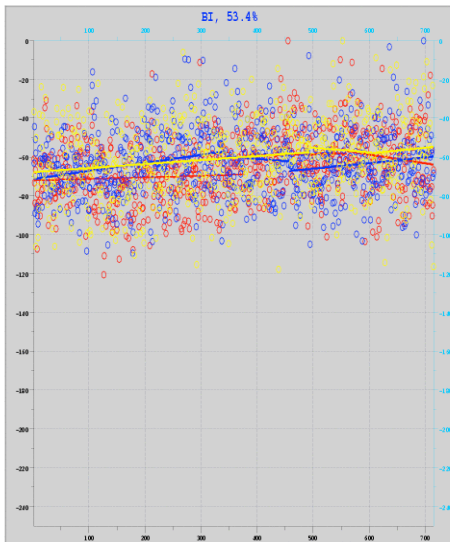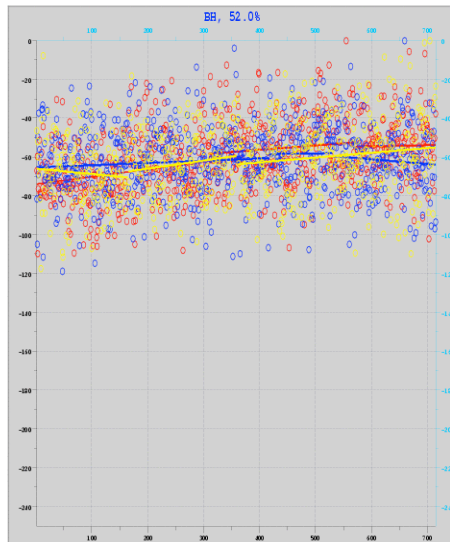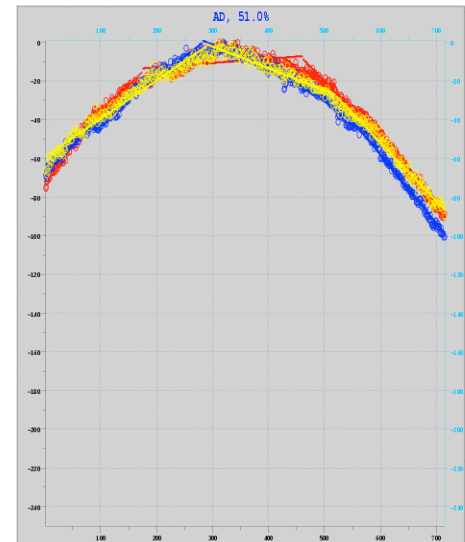

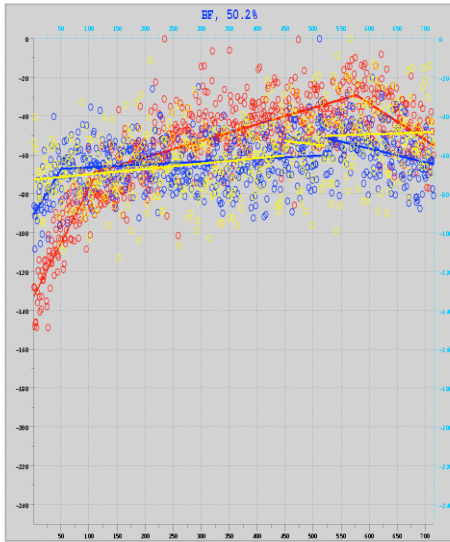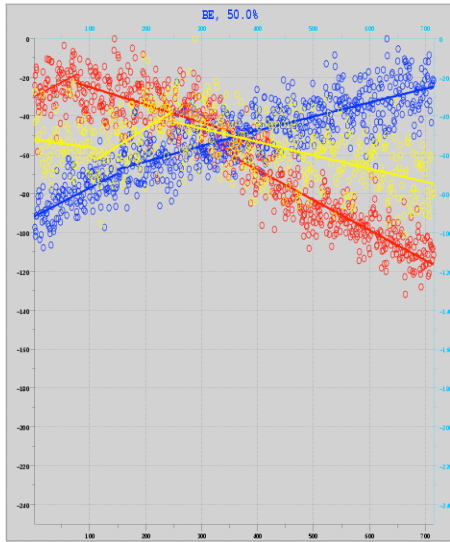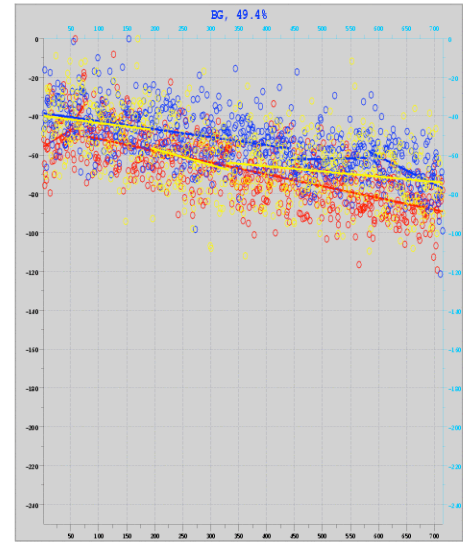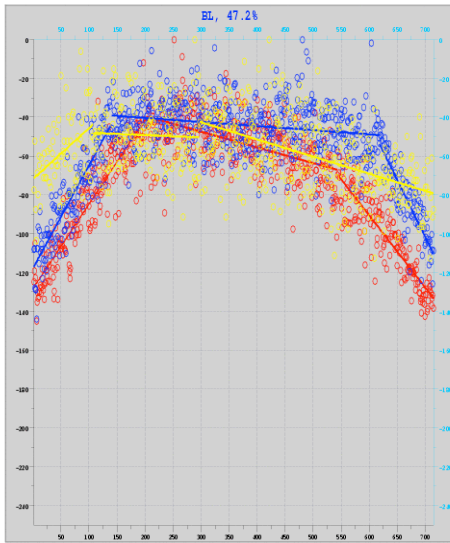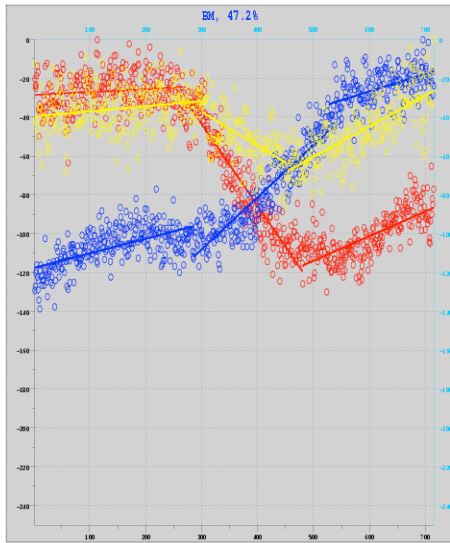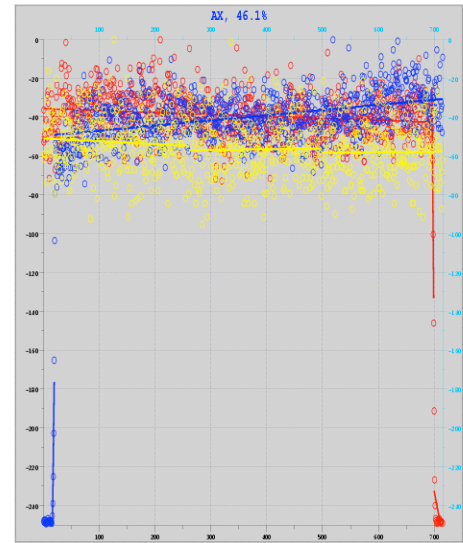

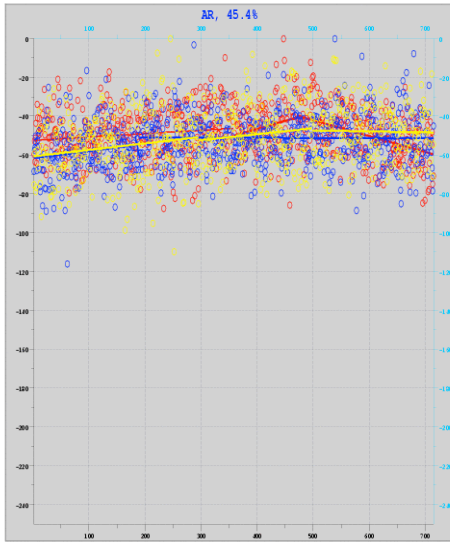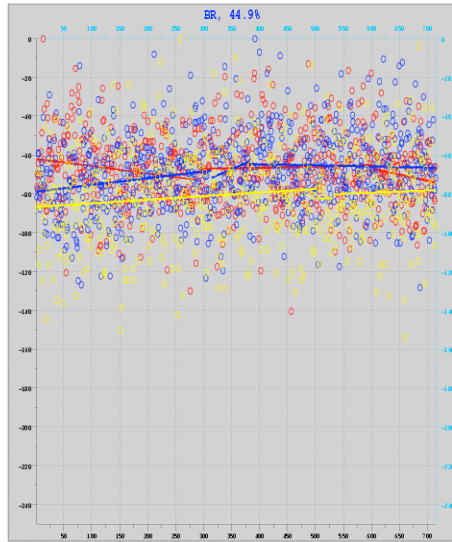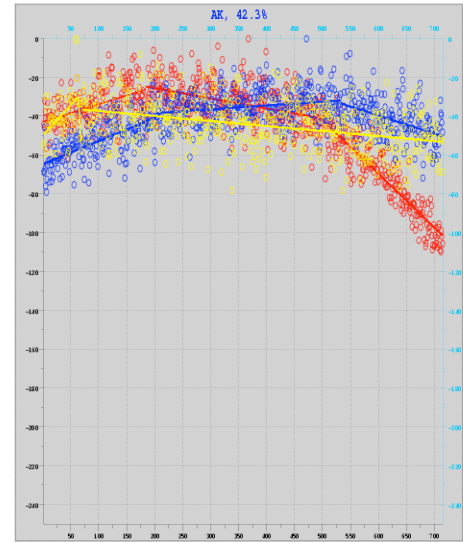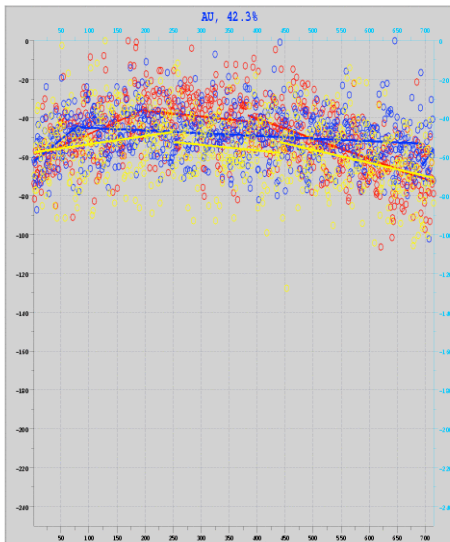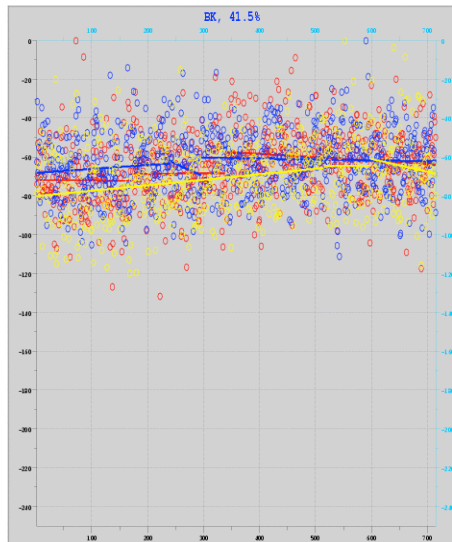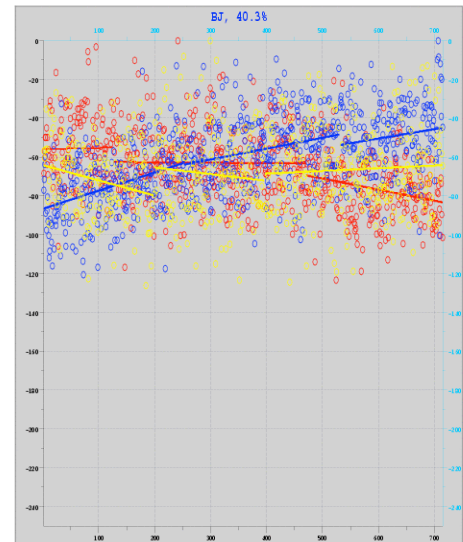

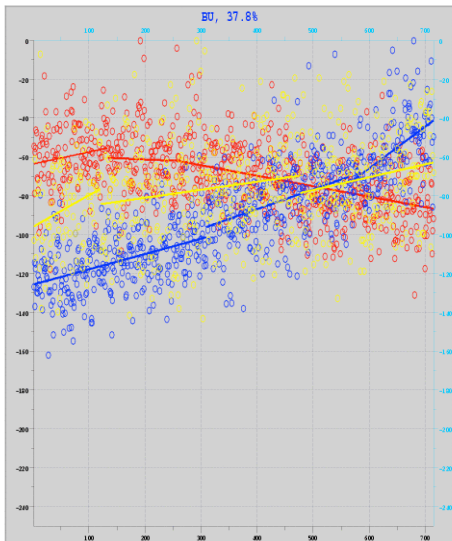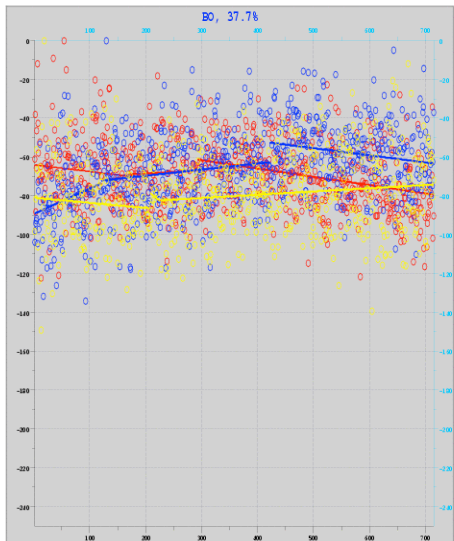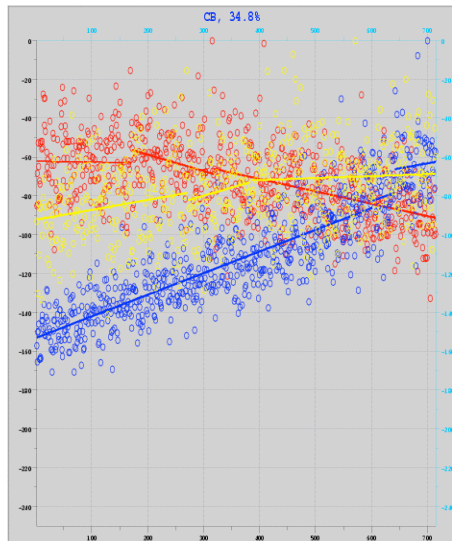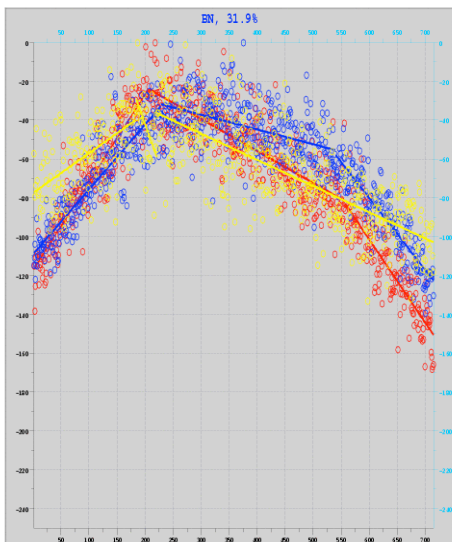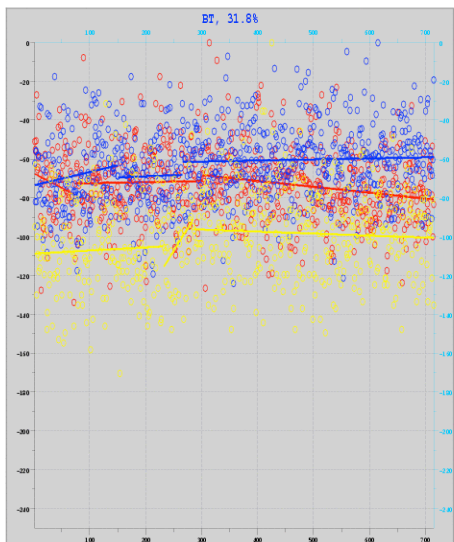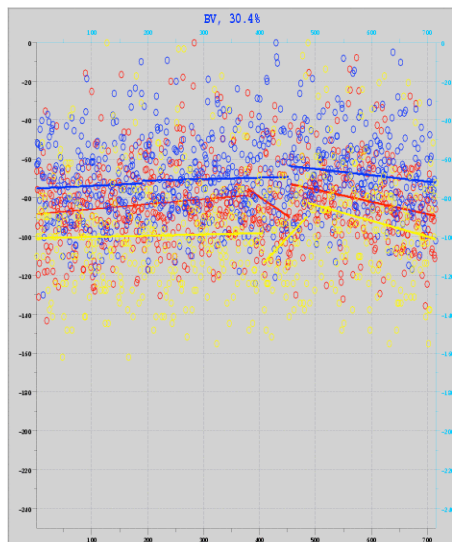

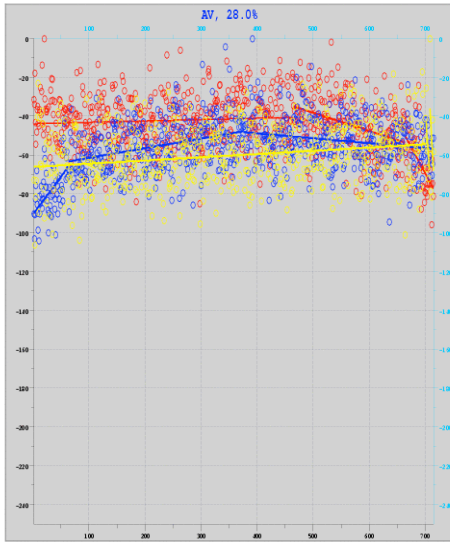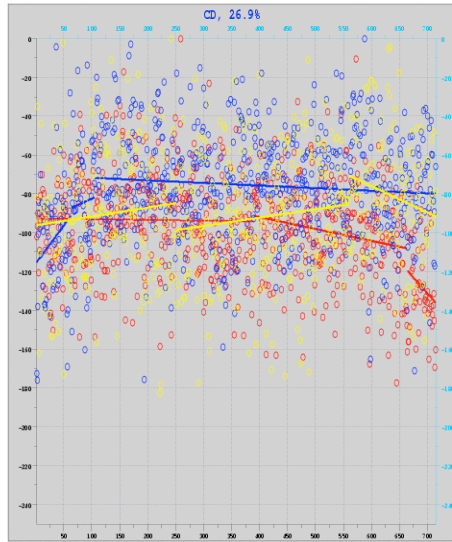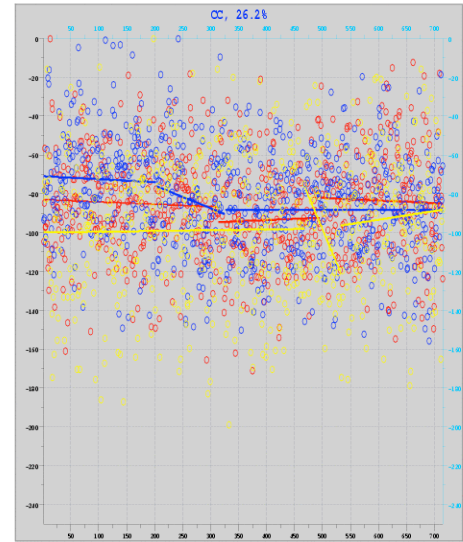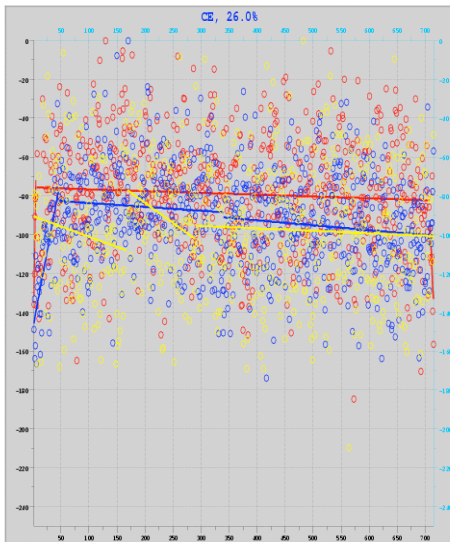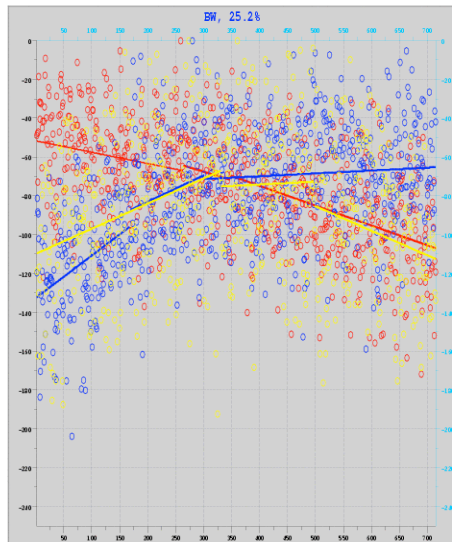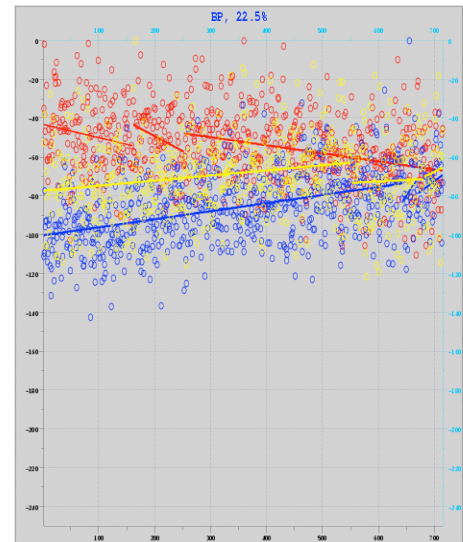

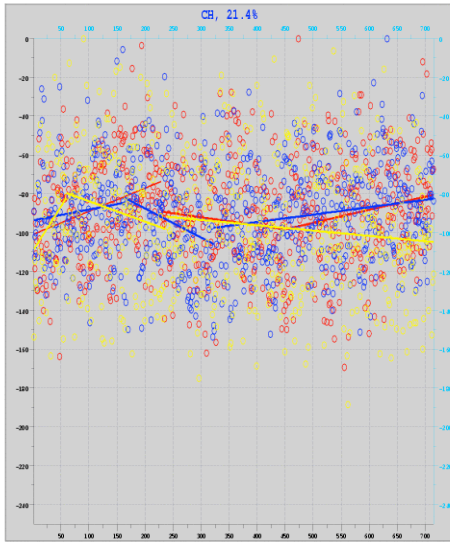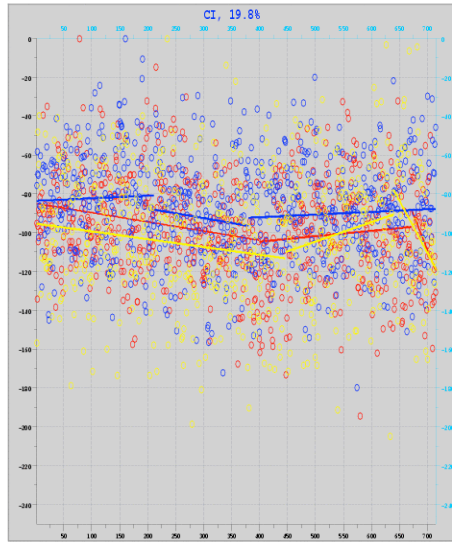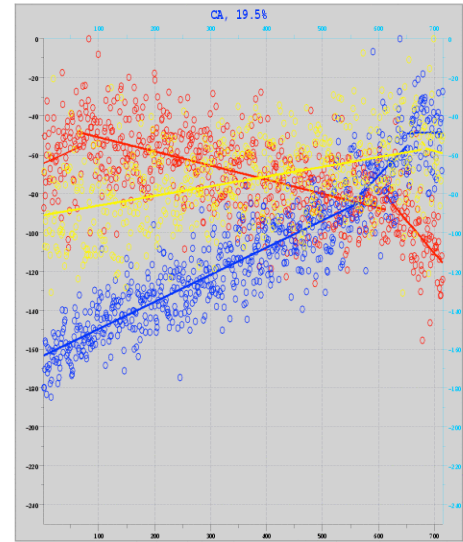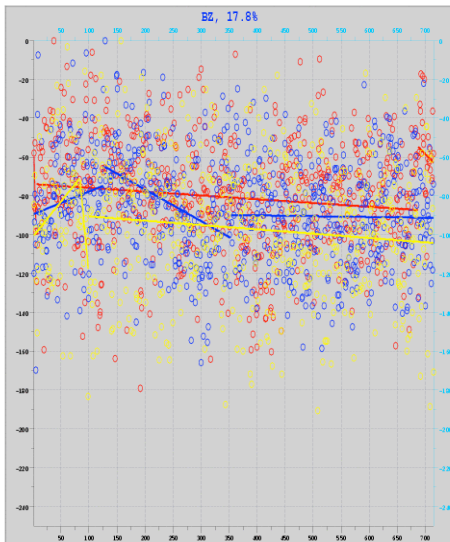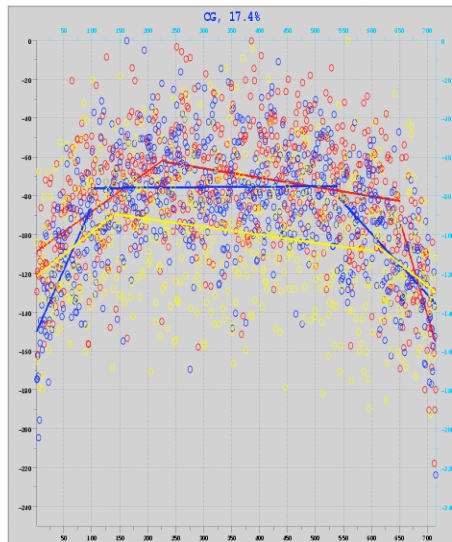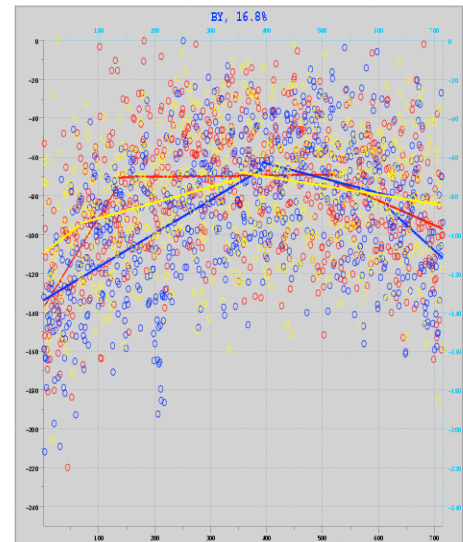

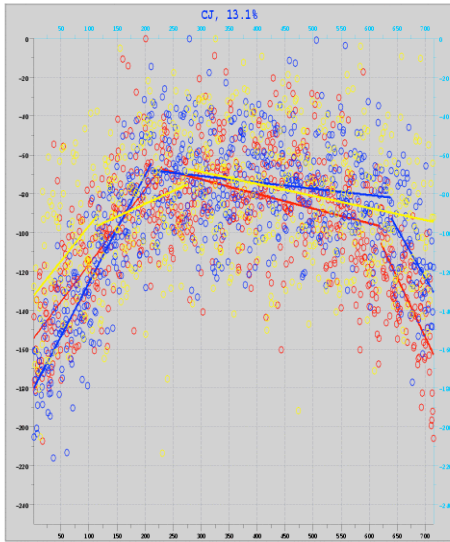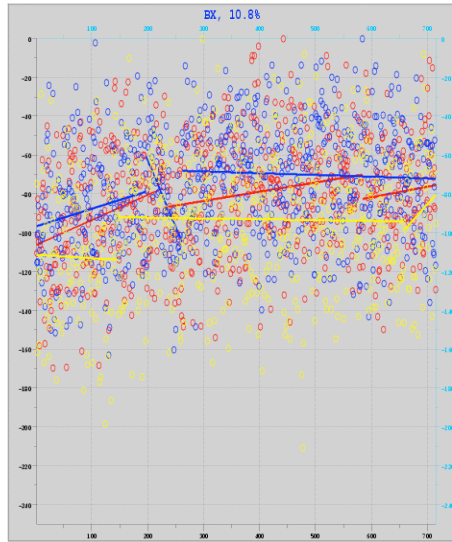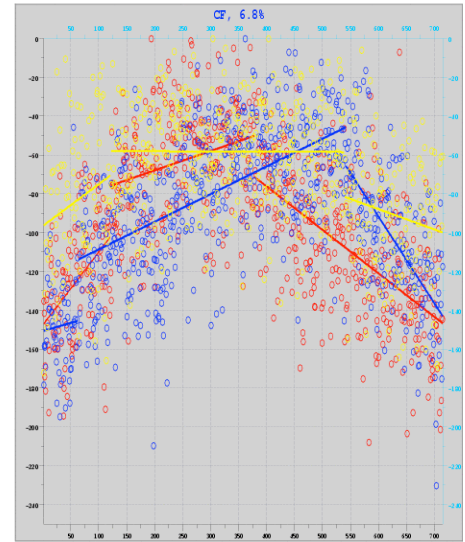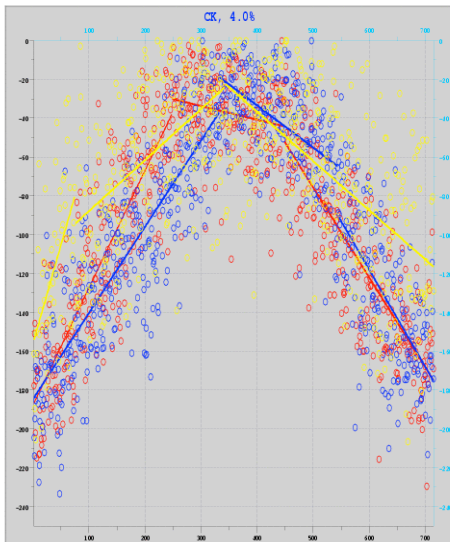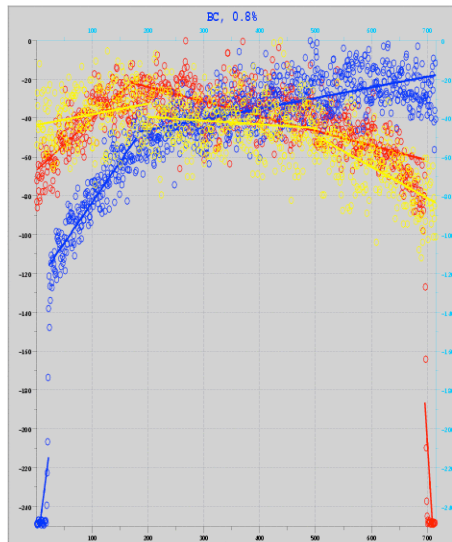



**Figure 2s:** 33 confirmatory set microscopes sorted by quality score: Upper Left to Lower Right (red), Lower Left to Upper Right (blue); Horizontal (yellow). Each of the three microscope traces includes three optimally segmenting lines.

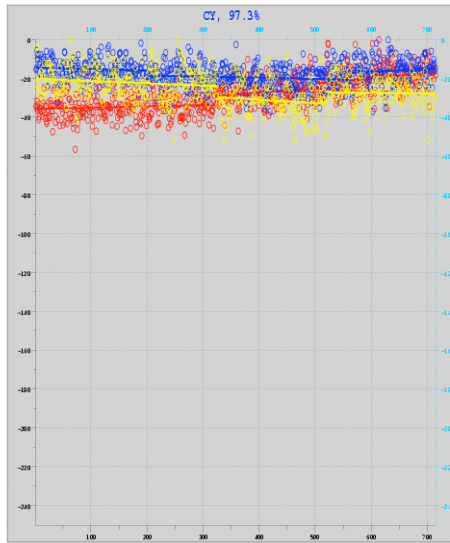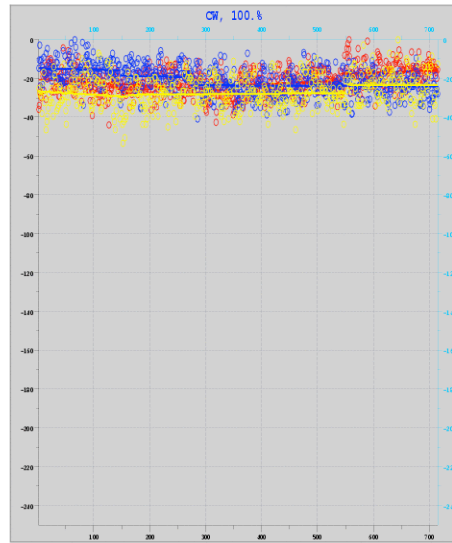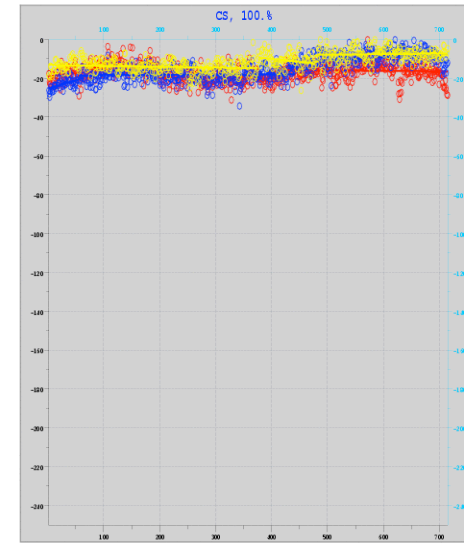

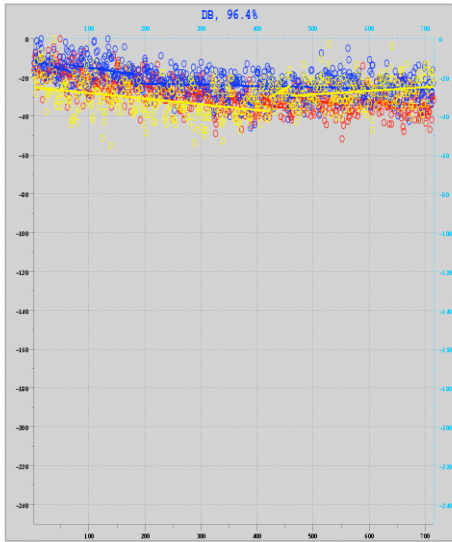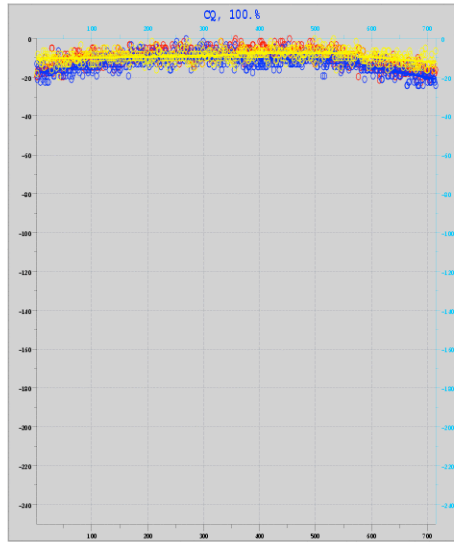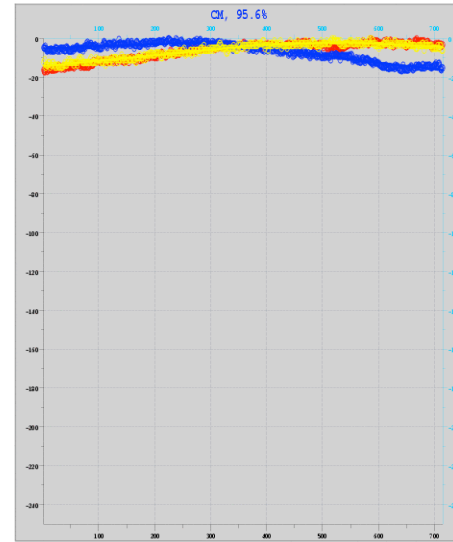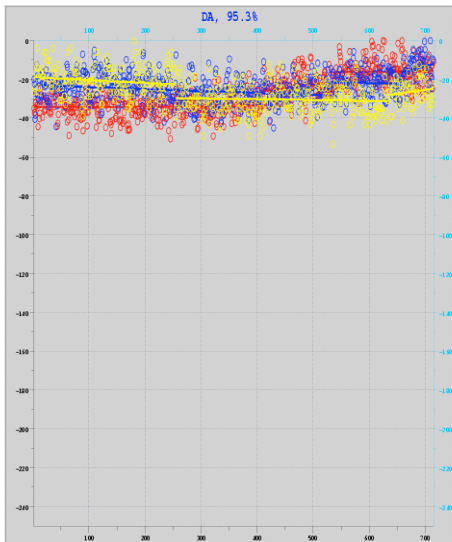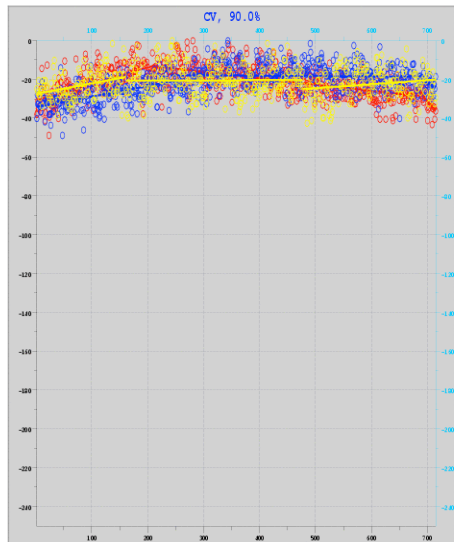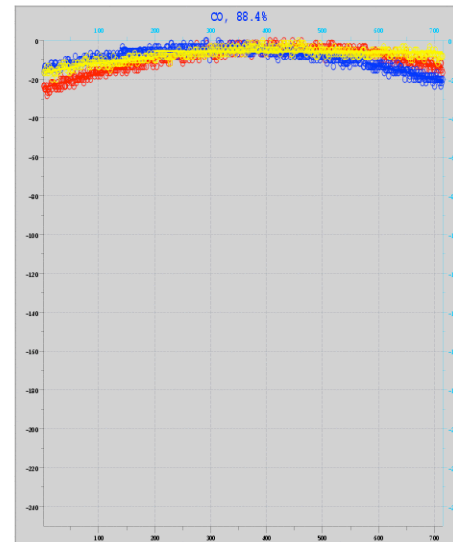

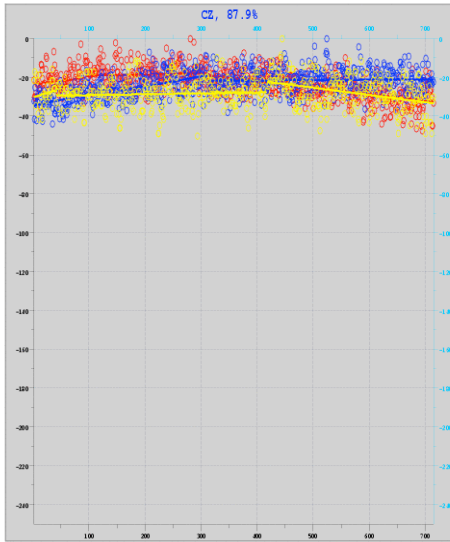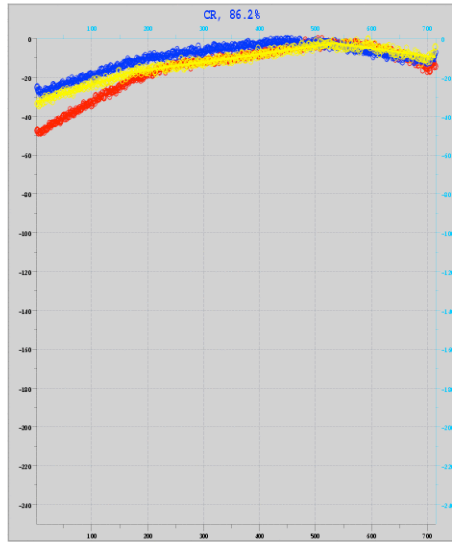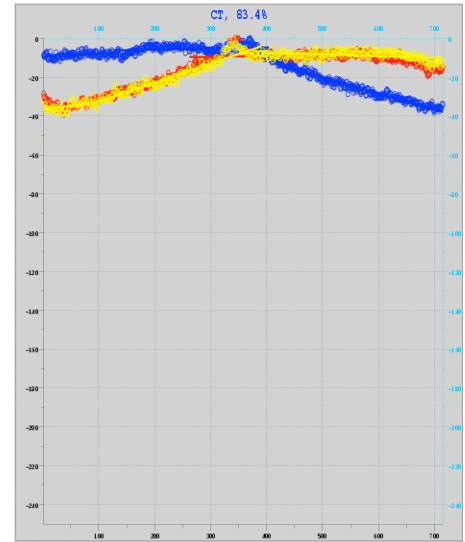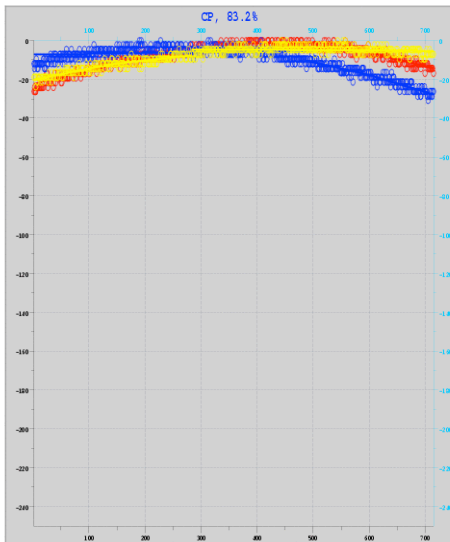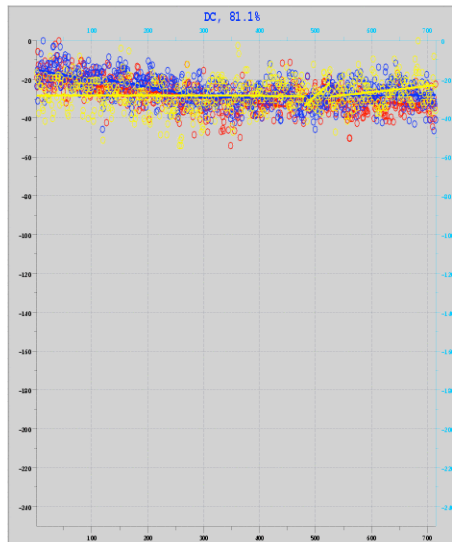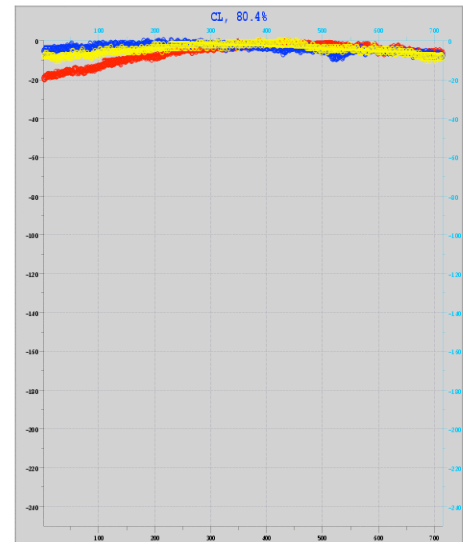

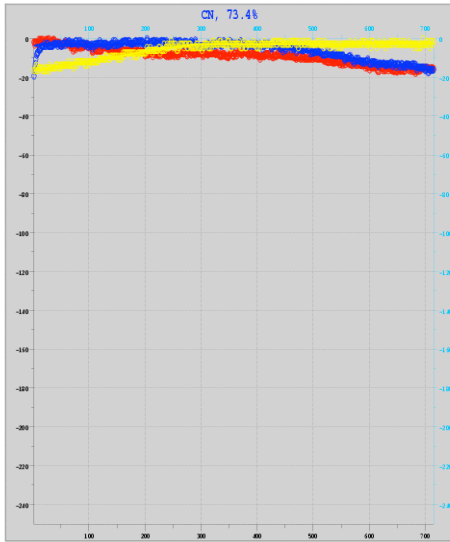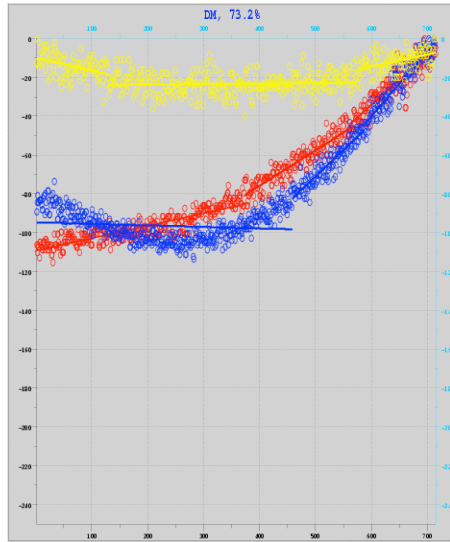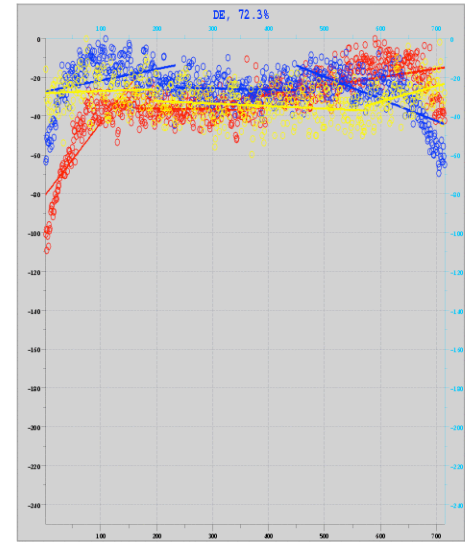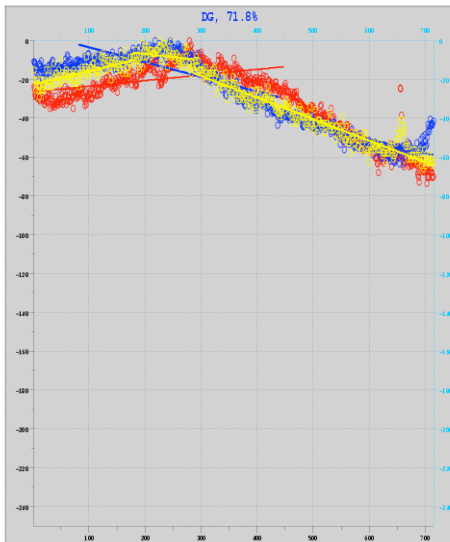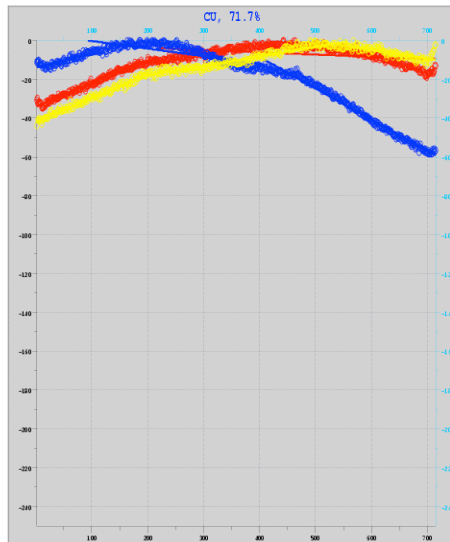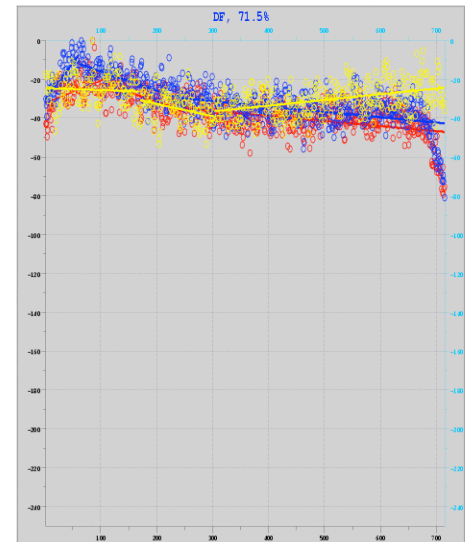

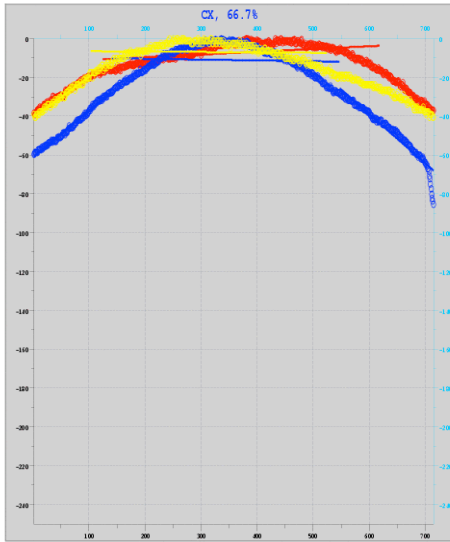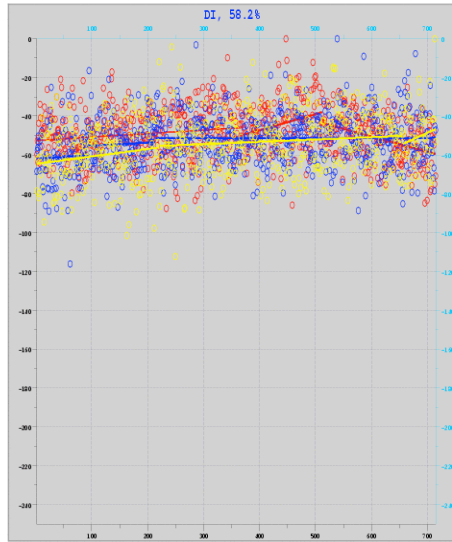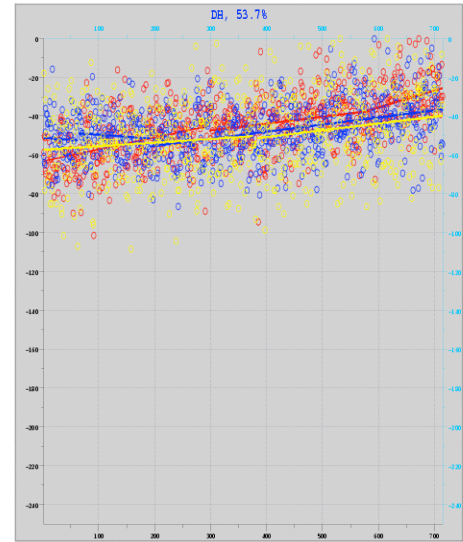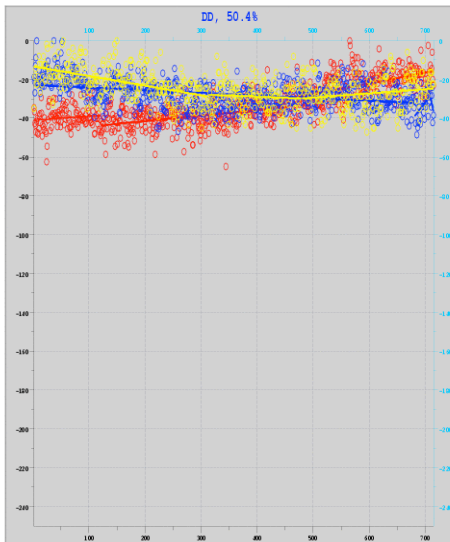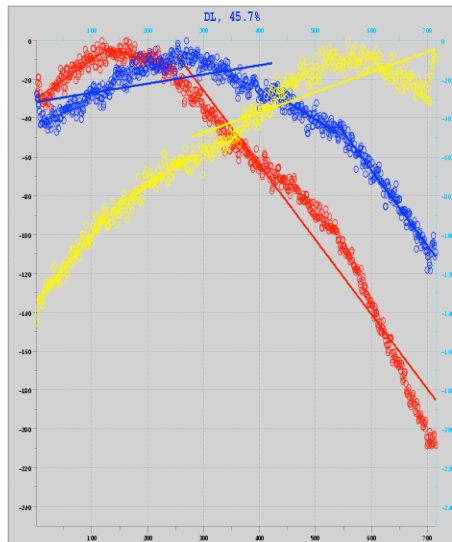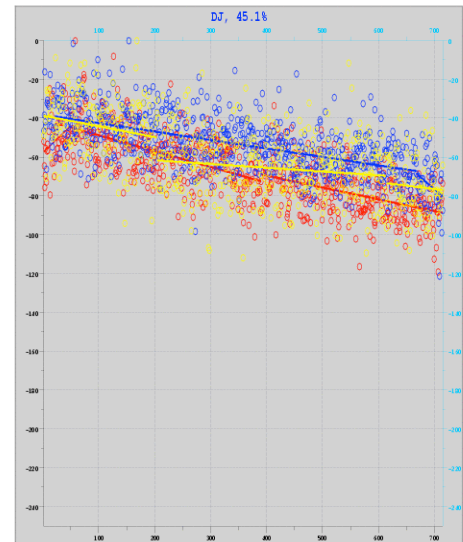

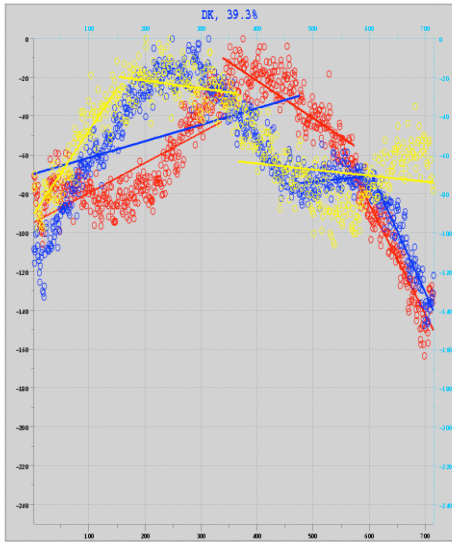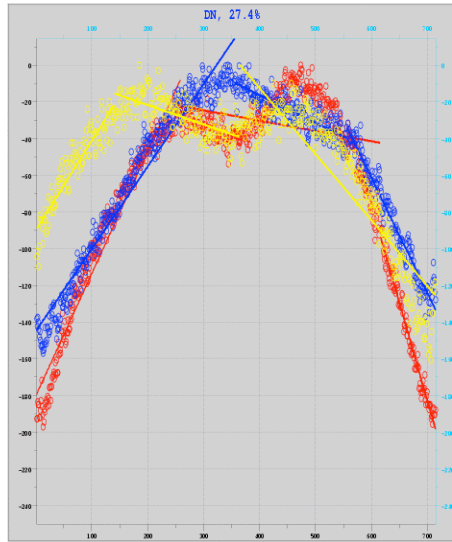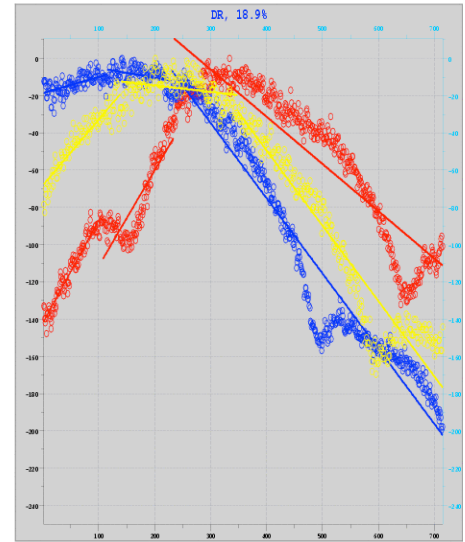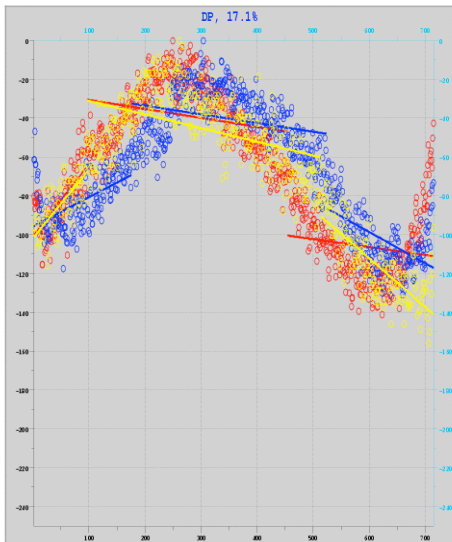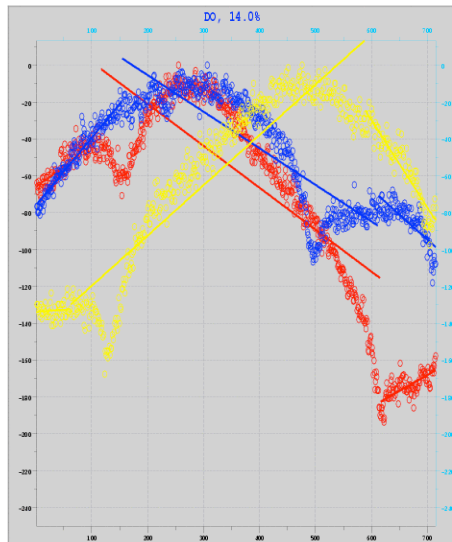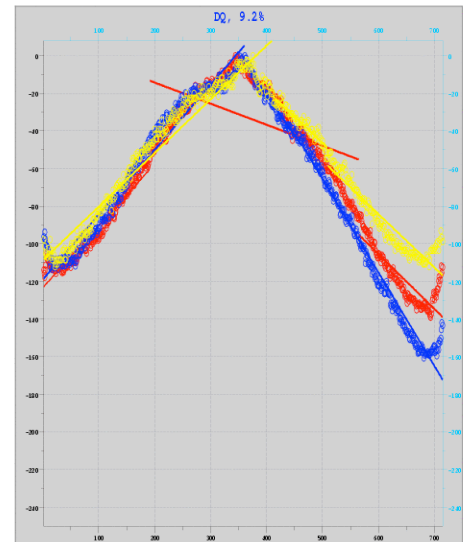

Supplement: jbt.26-37-s01.pdf [file jbt.26-37-s01.pdf]
