# Supplementary material
Source: PubMed Central journal article supplement (PMC4480041)
Supplement: jbt.26-37-s02.pdf [file jbt.26-37-s02.pdf]

**Equation 1:** *scaled intensity,  $I_s(i) = -255 \times (1 - (\text{intensity}(i) / \max(\text{intensity})))$ ,*  
*scaled abscissa(i) = 715 x abscissa(i) / n, i=1,...,n.*

**Equation 2:** *For the  $r^{\text{th}}$  rank, weight( $r$ ) =  $89 \frac{e^{-.0606r}}{\sum_{\omega=1}^{89} e^{-.0606\omega}}$*
